# Supplementary material
Source: Research Square preprint supplement (doi:10.21203/rs.3.rs-8963102/v1)
Supplement: Supplementary file 2 [file 2632bc427719d71c18435a06.docx]

**Supplementary Information**

Additional file 1: Unprocessed image of genomic PCR performed using primers specifically amplify *LdMasc* and the F1 and R1 primers shown in Fig. 1C

Additional file 2: Unprocessed image of RT-PCR illustrated in Fig 1D.

Additional file 3: Table S1. Result of BLASTn search against the whole genome sequence of *Lymantria dispar japonica*.

Additional file 4: Table S2. Results of BLASTn searches against the whole genome sequences of *Lymantria dispar dispar* and *L. d. asiatica.*

Additional file 5: Table S3. Results of BLASTn searches against the whole genome sequences of *Lymantria umbrosa.*

Additional file 6: Table S4. Result of the BLASTn search using the *Fet-W* piRNA sequence as a query against the whole genome sequence of *Lymantria dispar japonica*.

Additional file 7: Table S5. Result of the BLASTn search using the *Fet-W* piRNA sequence as a query against the whole genome sequence of *Lymantria dispar dispar.*

Additional file 8: Table S6. Result of the BLASTn search using the *Fet-W* piRNA sequence as a query against the whole genome sequence of *Lymantria dispar asiatica.*

Additional file 9: Table S7. Result of the blastn search using the *Fet-W* piRNA sequence as a query against the entire genome sequence of *Lymantria umbrosa.*

Additional file 10: Unprocessed image of gPCR results obtained using *LdMasc-W*-specific primers shown in Fig. 3B. Genomic DNA extracted from whole-body first-instar larvae of both sexes in *L. d. japonica* was used as a template.

Additional file 11: Unprocessed image of gPCR results obtained using *LdMasc-W*-specific primers shown in Fig. 3B. Genomic DNA extracted from whole-body first-instar larvae of both sexes in *L. umbrosa* (lower panel) was used as a template.

Additional file 12: Fig. S1 Comparison of nine nucleotide sequences obtained by 5’ RACE. To visualize the similarity of the obtained sequences, alignments were created using ClustalW (https://www.genome.jp/tools-bin/clustalw). Identical and similar nucleotides were highlighted in black and gray, respectively, using BoxShade software (https://junli.netlify.app/apps/boxshade/). U44942 indicates the 5’ end nucleotide sequence of unigene 44942, one of four unigenes exhibiting female-specific expression.

Additional file 13: Table S8. Primer sequences used for RT-PCR

Additional file 14: Fig. S2 RT-PCR results obtained using cDNA templates prepared from male and female gonads (♀ = ovary, ♂ = testis) in late-instar larvae, and primers specific for each of the nine transcripts shown in Fig. 4C. As a positive control, the same PCR was performed using primers capable of simultaneously amplifying four unigenes confirmed to be specifically expressed in females. PCR products were separated on 1.5% agarose gel containing 1 μg/mL ethidium bromide.

Additional file 15: Unprocessed image of the 5’RACE illustrated in Fig. 4B

Additional file 16: Unprocessed image of RT-PCR products obtained using cDNA derived from male and female eggs at 2 days post-laying shown in Fig. 5D. The two lanes on the far right show RT-PCR products derived from *EF-1α*, used as an internal standard gene.

Additional file 17: Unprocessed image of RT-PCR products obtained using cDNA derived from male and female eggs at 3 days post-laying shown in Fig. 5D. The two lanes on the far right show RT-PCR products derived from *EF-1α*, used as an internal standard gene.

Additional file 18: Unprocessed image of RT-PCR products obtained using cDNA derived from male and female eggs at 4 days post-laying shown in Fig. 5D. The two lanes on the far right show RT-PCR products derived from *EF-1α*, used as an internal standard gene.

Additional file 19: Table S9. Primer sequences used for 5'RACE.

Additional file 20: Unprocessed image of expression pattern of *Lddsx* detected by RT-PCR in the negative control groups (Egfp si) and female eggs with confirmed knockdown of *LdMasc-W* expression via injection of LdMasc-W si1.

Additional file 21: Unprocessed image of expression pattern of *Lddsx* detected by RT-PCR in female eggs with confirmed knockdown of *LdMasc-W* expression via injection of LdMasc-W si2.

Additional file 22: Unprocessed image of molecular sexing by genomic PCR using the Z-chromosome and W-chromosome-specific primers with genomic DNA extracted from F1 hybrid individuals obtained from crossing between *L. d. japonica* females and *L. umbrosa* males (JU-hybrid F1).

Additional file 23: Unprocessed image of RT-PCR analysis of expression pattern of *Lddsx* in individuals obtained from crossing between *L. d. japonica* females and *L. umbrosa* males (JU-hybrid F1).

Additional file 24: Unprocessed image of molecular sexing by genomic PCR using the Z-chromosome and W-chromosome-specific primers with genomic DNA extracted from F1 hybrid individuals obtained from crossing between *L. umbrosa* females and *L. d. japonica* males (UJ-hybrid F1).

Additional file 25: Unprocessed image of RT-PCR analysis of expression pattern of *Lddsx* in individuals obtained from crossing between *L. umbrosa* females and *L. d. japonica* males (UJ-hybrid F1).

Additional file 26: Fig. S3 Hatchability of eggs in the indicated lines is shown by the box-and-whisker plots. Significant differences between the UJ-hybrid F1 and other lines were examined using the Kruskal-Wallis test and Dunn's post hoc test (Bonferroni correction). n.s., not significant.

Additional file 27: Fig. S4 Comparison of putative amino acid sequences encoded by mRNA derived from *LdMasc-W* genes, which were homologous to the sequence of *LdMasc* exons 9 and 10. *LdMasc* exons 9 and 10 encode 418 C-terminal amino acid residues of the 808-amino acid LdMasc protein [8]. To visualize similarities between the amino acid sequences, alignments were created using ClustalW (https://www.genome.jp/tools-bin/clustalw). Identical and similar residues were highlighted in black and gray, respectively, using BoxShade software (https://junli.netlify.app/apps/boxshade/).

Additional file 28: Table S10. Primer sequences used for RT-qPCR.

Additional file 29: Table S11. Primer sequences used for *LdMasc* and *LdMasc-W*-specific genomic PCR.

Additional file 30: Table S12. Contigs showing sex differences in coverage.

Additional file 31: Table S13. Nucleotide sequences of siRNAs used in the embryonic RNAi experiments.
