# Supplementary material
Source: Research Square preprint supplement (doi:10.21203/rs.3.rs-8963102/v1)
Supplement: Supplementary file 4 [file 394d26e060b016f67834cd91.xlsx]

## Sheet: Sheet1
Table S11 Primer sequences used for LdMasc and LdMasc-W-specific genomic PCR
Target	Primers	Sequence(5'→3')
LdMasc-W1	W1	TTCTCGGCTAAGCGAAGAGCTG
	Masc5RACE2R	GCTGCAGGTGTTGAGCTCTGAGTAG
LdMasc-W2, 6, 9, 14	WGC	CTCTCAGCCGTACTGCTAAAGCTAC
	Masc5RACE2R	GCTGCAGGTGTTGAGCTCTGAGTAG
LdMasc-W3	W3	AATCACCCTATGCACCATATCTTCTG
	Masc5RACE2R	GCTGCAGGTGTTGAGCTCTGAGTAG
LdMasc-W4	W4	ACCCGGTTCAAACAGCGCATG
	Masc5RACE2R	GCTGCAGGTGTTGAGCTCTGAGTAG
LdMasc-W8	W8	TATCTGCAGTAACGATGACGGGTTG
	Masc5RACE2R	GCTGCAGGTGTTGAGCTCTGAGTAG
LdMasc-W10, 37	WGA1	GCCCTCGCTTCGCTTCGGATTC
	Masc5RACE2R	GCTGCAGGTGTTGAGCTCTGAGTAG
LdMasc-W11, 16~20	WGF1	ATCACTACTTGACAGATCGCG
	Masc5RACE2R	GCTGCAGGTGTTGAGCTCTGAGTAG
LdMasc-W15	W15	TTATGCCTGTGAGACGTCATGTC
	Masc5RACE2R	GCTGCAGGTGTTGAGCTCTGAGTAG
LdMasc-W25, 26	WGF2	AGTAGCCTATGTCCTTTCTCAAGC
	Masc5RACE2R	GCTGCAGGTGTTGAGCTCTGAGTAG
LdMasc-W27, 31, 42, 47, 49, 51	WGA2	CAGAATATTGCACAGGCGCAAAG
	Masc5RACE2R	GCTGCAGGTGTTGAGCTCTGAGTAG
LdMasc-W21	W21	GTTGACAACGACACACTTTCAACAG
	Masc5RACE2R	GCTGCAGGTGTTGAGCTCTGAGTAG
LdMasc-W other than the above	Wcom26	TCGCACTCTGGATGGATGTCAGC
	Masc5RACE2R	GCTGCAGGTGTTGAGCTCTGAGTAG
LdMasc	LdMasc_seqF1	TCAGTTCCTCAACTGCAAACTAC
	LdMascR1	CTCTTGGTCATATCTTTGCGAAAC
