# Supplementary material
Source: Research Square preprint supplement (doi:10.21203/rs.3.rs-8963102/v1)
Supplement: Supplementary file 8 [file 46df98a4c5cdbf28de3ce35e.xlsx]

## Sheet: Sheet1
Table S3 Results of BLASTn searches aganst the whole genome sequences of Lymantra umbrosa
contg name	contg sze(bp)	Score	e-value	dentty	dentty(%)	query start	query end	sze(bp)	contg start	contg end
BAAJN010000015	44158847	20842	0	11575/11698	99	7678	19341	11663	29667355	29655710
		14556	0	7927/7947	99	1	7945	7944	29675295	29667356
		1962	0	1589/1845	86	6986	8812	1826	14840278	14838446
		1375	0	1534/1919	80	6606	8497	1891	27530791	27528886
		1325	0	911/1001	91	7662	8653	991	18189047	18188066
		1101	0	1300/1644	79	6975	8599	1624	40231155	40229525
		1096	0	1075/1305	82	7532	8812	1280	11693331	11692047
		1040	0	876/1026	85	7807	8815	1008	5933270	5932253
		935	0	1093/1377	79	7152	8497	1345	18760537	18761906
BAAJN010000027	39552491	2737	0	2192/2538	86	6299	8812	2513	20379138	20381663
		2656	0	2182/2542	86	6299	8812	2513	19822962	19825483
		1748	0	1421/1650	86	7182	8812	1630	27640870	27639235
		1471	0	1153/1328	87	6299	7613	1314	38660100	38661427
		1376	0	1274/1525	84	7115	8607	1492	39447178	39445675
		1055	0	891/1045	85	7780	8812	1032	10530550	10531582
		859	0	980/1216	81	7657	8813	1156	29068042	29066854
		739	0	1026/1326	77	7517	8808	1291	18315050	18316357
BAAJN010000005	38613215	2732	0	2193/2540	86	6299	8812	2513	8183160	8185685
		2732	0	2191/2537	86	6302	8812	2510	30212682	30210160
		1491	0	1765/2233	79	6293	8497	2204	28479049	28481265
		1482	0	1830/2327	79	6346	8621	2275	7789085	7791395
		1352	0	1507/1885	80	6636	8497	1861	22897324	22899194
		1332	0	1539/1933	80	6918	8812	1894	23431140	23429230
		898	0	1118/1424	79	7217	8619	1402	22740703	22742108
		894	0	1154/1480	78	7153	8617	1464	5117131	5115672
		815	0	821/1001	82	7825	8814	989	28621648	28620677
BAAJN010000034	38508542	2723	0	2179/2522	86	6317	8814	2497	25670795	25668288
		2715	0	2186/2535	86	6302	8812	2510	18771651	18769129
		2651	0	2176/2535	86	6302	8812	2510	14307911	14305398
		2521	0	2160/2538	85	6299	8812	2513	23462809	23465292
		1537	0	1743/2189	80	6334	8497	2163	22739307	22737132
		1498	0	1745/2201	79	6325	8497	2172	1505181	1507365
		1417	0	1171/1364	86	7479	8812	1333	19276737	19275379
		1382	0	1507/1878	80	6639	8497	1858	18191400	18193263
		1184	0	1292/1609	80	6914	8497	1583	601640	600040
		710	0	1085/1421	76	7435	8811	1376	25310998	25312404
BAAJN010000045	23212050	2721	0	2191/2540	86	6299	8812	2513	15293199	15295724
		2708	0	2187/2538	86	6299	8812	2513	12426204	12428728
		2665	0	2177/2535	86	6302	8812	2510	1377041	1374519
		2305	0	2122/2547	83	6299	8812	2513	16075368	16077899
		1685	0	1608/1942	83	6918	8812	1894	16219373	16221306
		1548	0	1758/2206	80	6325	8497	2172	17916038	17918228
		1184	0	1319/1651	80	6914	8544	1630	14038400	14040042
		1118	0	1340/1694	79	6968	8619	1651	23166097	23167779
		723	0	830/1042	80	7590	8612	1022	20715323	20714293
