# Supplementary material
Source: Research Square preprint supplement (doi:10.21203/rs.3.rs-8963102/v1)
Supplement: Supplementary file 13 [file 7abb759a28179a09c454782a.xlsx]

## Sheet: Sheet1
Table S10 Primer sequences used for RT-qPCR
Target	Primers	Sequence(5'→3')
LdEf1-α	LdEF1qF1	TTACACGTGGATTGTAATCCGTGAC
	LdEF1qR1	TGAAGGAACCTTTACCCATTTCCTG
LdMasc	LdMasc qRT1F	CAGTTCCTCAACTGCAAACTACAC
	LdMasc qRT1R	CAGTGGAGGTGGTGGTTTGCTTAC
LdMasc-W	LdMasc KDqF1	TGTCATATCCACATGTAAGAGCAAC
	LdMasc KDqR1	CCGTTGAAATGGCGGTATGCTG
Fet-W	LdFem31F	CAATATTGTTTGTGCGCGGGTG
	LdFem31R	GCCAAAACAACACAAGAAACGGC
