# Supplementary material
Source: Research Square preprint supplement (doi:10.21203/rs.3.rs-8963102/v1)
Supplement: Supplementary file 15 [file a66d2a0d4248fe665f559771.xlsx]

## Sheet: Lddispar Wを対象としたblastn
Table S2 Results of BLASTn searches against the whole genome sequences of Lymantria dispar dispar and L. d. asiatica
contig name	contig size(bp)	Score	e-value	identity	identity(%)	query start	query end	size(bp)	contig start	contig end
OY755156.1	7811020	6926	0	3791/3809	99	13936	17735	3799	793714	789906
		6926	0	3789/3806	99	13936	17732	3796	1200967	1204772
		6922	0	3787/3804	99	13938	17732	3794	971773	975576
CM063456.1	32411931	18707	0	10171/10189	99	9167	19346	10179	28141919	28131731
		9899	0	5405/5425	99	13931	19346	5415	31952418	31957841
		9899	0	5405/5425	99	13931	19346	5415	31973235	31978658
		9897	0	5396/5412	99	13944	19346	5402	20993320	20998730
		9897	0	5403/5422	99	13935	19346	5411	32007819	32013239
		9893	0	5404/5425	99	13931	19346	5415	31943446	31948869
