# Supplementary material
Source: Research Square preprint supplement (doi:10.21203/rs.3.rs-8963102/v1)
Supplement: Supplementary file 16 [file a8d04a2cae2b0780d01db9ab.xlsx]

## Sheet: Sheet1
Table S9 Primer sequences used for 5'RACE
Primers	Sequence(5'→3')
GSP1	CTTGACGGTACTGATGCGGTGCTTG
GSP2	CAGGAAACAGCTATGAC
