# Supplementary material
Source: Research Square preprint supplement (doi:10.21203/rs.3.rs-8963102/v1)
Supplement: Supplementary file 17 [file bfa8cd16ad456ba86083a057.xlsx]

## Sheet: 名称未設定2
Table S5 Result of the BLASTn search using the Fet-W piRNA sequence as a query against the whole genome sequence of Lymantria dispar dispar
contig name	contig size(bp)	chromosome	number	e-value	Identity	Identity(%)	Query Start	Query End	size(bp)	Sbjct Start	Sbjct End
OY755156.1	7811020	W	1	3e-09	29/29	100	1	29	29	7330549	7330577
			2	3e-09	29/29	100	1	29	29	7331356	7331384
			3	3e-09	29/29	100	1	29	29	7331792	7331820
			4	3e-09	29/29	100	1	29	29	7333400	7333428
			5	3e-09	29/29	100	1	29	29	7334207	7334235
			6	3e-09	29/29	100	1	29	29	7335448	7335476
			7	3e-09	29/29	100	1	29	29	7336255	7336283
			8	3e-09	29/29	100	1	29	29	7337062	7337090
			9	3e-09	29/29	100	1	29	29	7339104	7339132
			10	3e-09	29/29	100	1	29	29	7341148	7341176
			11	3e-09	29/29	100	1	29	29	7342389	7342417
			12	3e-09	29/29	100	1	29	29	7343196	7343224
			13	3e-09	29/29	100	1	29	29	7344003	7344031
			14	3e-09	29/29	100	1	29	29	7344809	7344837
			15	3e-09	29/29	100	1	29	29	7346050	7346078
			16	3e-09	29/29	100	1	29	29	7346857	7346885
			17	3e-09	29/29	100	1	29	29	7347664	7347692
			18	3e-09	29/29	100	1	29	29	7349272	7349300
			19	3e-09	29/29	100	1	29	29	7350513	7350541
			20	3e-09	29/29	100	1	29	29	7351320	7351348
			21	3e-09	29/29	100	1	29	29	7352127	7352155
			22	3e-09	29/29	100	1	29	29	7353735	7353763
			23	3e-09	29/29	100	1	29	29	7354976	7355004
			24	3e-09	29/29	100	1	29	29	7355783	7355811
			25	3e-09	29/29	100	1	29	29	7357024	7357052
			26	3e-09	29/29	100	1	29	29	7357831	7357859
			27	3e-09	29/29	100	1	29	29	7358638	7358666
			28	3e-09	29/29	100	1	29	29	7360246	7360274
			29	3e-09	29/29	100	1	29	29	7361053	7361081
			30	3e-09	29/29	100	1	29	29	7362294	7362322
			31	3e-09	29/29	100	1	29	29	7363535	7363563
			32	3e-09	29/29	100	1	29	29	7365068	7365096
			33	3e-09	29/29	100	1	29	29	7367103	7367131
			34	3e-09	29/29	100	1	29	29	7368848	7368876
			35	3e-09	29/29	100	1	29	29	7369589	7369617
			36	3e-09	29/29	100	1	29	29	7371624	7371652
			37	3e-09	29/29	100	1	29	29	7375140	7375168
			38	3e-09	29/29	100	1	29	29	7376688	7376716
			39	3e-09	29/29	100	1	29	29	7378723	7378751
			40	3e-09	29/29	100	1	29	29	7382081	7382109
			41	3e-09	29/29	100	1	29	29	7383629	7383657
			42	3e-09	29/29	100	1	29	29	7385665	7385693
			43	3e-09	29/29	100	1	29	29	7390178	7390206
			44	3e-09	29/29	100	1	29	29	7392228	7392256
			45	3e-09	29/29	100	1	29	29	7394648	7394676
			46	3e-09	29/29	100	1	29	29	7396181	7396209
			47	3e-09	29/29	100	1	29	29	7401814	7401842
			48	3e-09	29/29	100	1	29	29	7405041	7405069
			49	3e-09	29/29	100	1	29	29	7408500	7408528
			50	3e-09	29/29	100	1	29	29	7410033	7410061
			51	3e-09	29/29	100	1	29	29	7411276	7411304
			52	3e-09	29/29	100	1	29	29	7411647	7411675
			53	3e-09	29/29	100	1	29	29	7419260	7419288
			54	3e-09	29/29	100	1	29	29	7420067	7420095
			55	3e-09	29/29	100	1	29	29	7423293	7423321
			56	3e-09	29/29	100	1	29	29	7424907	7424935
			57	3e-09	29/29	100	1	29	29	7426521	7426549
			58	3e-09	29/29	100	1	29	29	7429065	7429093
			59	3e-09	29/29	100	1	29	29	7431113	7431141
			60	3e-09	29/29	100	1	29	29	7432725	7432753
			61	3e-09	29/29	100	1	29	29	7435941	7435969
			62	3e-09	29/29	100	1	29	29	7437553	7437581
			63	3e-09	29/29	100	1	29	29	7439165	7439193
			64	3e-09	29/29	100	1	29	29	7440838	7440866
			65	3e-09	29/29	100	1	29	29	7442079	7442107
			66	3e-09	29/29	100	1	29	29	7443752	7443780
			67	3e-09	29/29	100	1	29	29	7446526	7446554
			68	3e-09	29/29	100	1	29	29	7450614	7450642
			69	3e-09	29/29	100	1	29	29	7452226	7452254
			70	3e-09	29/29	100	1	29	29	7453759	7453787
			71	3e-09	29/29	100	1	29	29	7457842	7457870
			72	3e-09	29/29	100	1	29	29	7459454	7459482
			73	3e-09	29/29	100	1	29	29	7461066	7461094
			74	3e-09	29/29	100	1	29	29	7462678	7462706
			75	3e-09	29/29	100	1	29	29	7464351	7464379
			76	3e-09	29/29	100	1	29	29	7468359	7468387
			77	3e-09	29/29	100	1	29	29	7469971	7469999
			78	3e-09	29/29	100	1	29	29	7473551	7473579
			79	3e-09	29/29	100	1	29	29	7476773	7476801
			80	3e-09	29/29	100	1	29	29	7478385	7478413
			81	3e-09	29/29	100	1	29	29	7481965	7481993
			82	3e-09	29/29	100	1	29	29	7483638	7483666
			83	3e-09	29/29	100	1	29	29	7485976	7486004
			84	3e-09	29/29	100	1	29	29	7487649	7487677
			85	3e-09	29/29	100	1	29	29	7489908	7489936
			86	3e-09	29/29	100	1	29	29	7491441	7491469
			87	3e-09	29/29	100	1	29	29	7494360	7494388
			88	3e-09	29/29	100	1	29	29	7495102	7495130
			89	3e-09	29/29	100	1	29	29	7496635	7496663
			90	3e-09	29/29	100	1	29	29	7497942	7497970
			91	3e-09	29/29	100	1	29	29	7499615	7499643
			92	3e-09	29/29	100	1	29	29	7501148	7501176
			93	3e-09	29/29	100	1	29	29	7507846	7507874
			94	3e-09	29/29	100	1	29	29	7509458	7509486
			95	3e-09	29/29	100	1	29	29	7511070	7511098
			96	3e-09	29/29	100	1	29	29	7512743	7512771
			97	3e-09	29/29	100	1	29	29	7513984	7514012
			98	3e-09	29/29	100	1	29	29	7515657	7515685
			99	3e-09	29/29	100	1	29	29	7518431	7518459
			100	3e-09	29/29	100	1	29	29	7522519	7522547
			101	3e-09	29/29	100	1	29	29	7524131	7524159
			102	3e-09	29/29	100	1	29	29	7525664	7525692
			103	3e-09	29/29	100	1	29	29	7529747	7529775
			104	3e-09	29/29	100	1	29	29	7531359	7531387
			105	3e-09	29/29	100	1	29	29	7532971	7532999
			106	3e-09	29/29	100	1	29	29	7534583	7534611
			107	3e-09	29/29	100	1	29	29	7536256	7536284
			108	3e-09	29/29	100	1	29	29	7537789	7537817
			109	3e-09	29/29	100	1	29	29	7543758	7543786
			110	3e-09	29/29	100	1	29	29	7544934	7544962
			111	3e-09	29/29	100	1	29	29	7545676	7545704
			112	3e-09	29/29	100	1	29	29	7549903	7549931
			113	3e-09	29/29	100	1	29	29	7551515	7551543
			114	3e-09	29/29	100	1	29	29	7552525	7552553
			115	3e-09	29/29	100	1	29	29	7553332	7553360
			116	3e-09	29/29	100	1	29	29	7554074	7554102
			117	3e-09	29/29	100	1	29	29	7558301	7558329
			118	3e-09	29/29	100	1	29	29	7559913	7559941
			119	3e-09	29/29	100	1	29	29	7561793	7561821
			120	3e-09	29/29	100	1	29	29	7564191	7564219
			121	3e-09	29/29	100	1	29	29	7565803	7565831
			122	3e-09	29/29	100	1	29	29	7568643	7568671
			123	3e-09	29/29	100	1	29	29	7570562	7570590
			124	3e-09	29/29	100	1	29	29	7572174	7572202
			125	3e-09	29/29	100	1	29	29	7575014	7575042
			126	3e-09	29/29	100	1	29	29	7575385	7575413
			127	3e-09	29/29	100	1	29	29	7575756	7575784
			128	3e-09	29/29	100	1	29	29	7577804	7577832
			129	3e-09	29/29	100	1	29	29	7579416	7579444
			130	3e-09	29/29	100	1	29	29	7581089	7581117
			131	3e-09	29/29	100	1	29	29	7584155	7584183
			132	3e-09	29/29	100	1	29	29	7584961	7584989
			133	3e-09	29/29	100	1	29	29	7587359	7587387
			134	3e-09	29/29	100	1	29	29	7588971	7588999
			135	3e-09	29/29	100	1	29	29	7591811	7591839
			136	3e-09	29/29	100	1	29	29	7592182	7592210
			137	3e-09	29/29	100	1	29	29	7592553	7592581
			138	3e-09	29/29	100	1	29	29	7594603	7594631
			139	3e-09	29/29	100	1	29	29	7596136	7596164
			140	3e-09	29/29	100	1	29	29	7597312	7597340
			141	3e-09	29/29	100	1	29	29	7597683	7597711
			142	3e-09	29/29	100	1	29	29	7599675	7599703
			143	3e-09	29/29	100	1	29	29	7602515	7602543
			144	3e-09	29/29	100	1	29	29	7602886	7602914
			145	3e-09	29/29	100	1	29	29	7607105	7607133
			146	3e-09	29/29	100	1	29	29	7607185	7607213
			147	3e-09	29/29	100	1	29	29	7607556	7607584
			148	3e-09	29/29	100	1	29	29	7608354	7608382
			149	3e-09	29/29	100	1	29	29	7608434	7608462
			150	3e-09	29/29	100	1	29	29	7608805	7608833
			151	3e-09	29/29	100	1	29	29	7613964	7613992
			152	3e-09	29/29	100	1	29	29	7615918	7615946
			153	3e-09	29/29	100	1	29	29	7617217	7617245
			154	3e-09	29/29	100	1	29	29	7617297	7617325
			155	3e-09	29/29	100	1	29	29	7619322	7619350
			156	3e-09	29/29	100	1	29	29	7619402	7619430
			157	3e-09	29/29	100	1	29	29	7619773	7619801
			158	3e-09	29/29	100	1	29	29	7625778	7625806
			159	3e-09	29/29	100	1	29	29	7625858	7625886
			160	3e-09	29/29	100	1	29	29	7629043	7629071
