# Supplementary material
Source: Research Square preprint supplement (doi:10.21203/rs.3.rs-8963102/v1)
Supplement: Supplementary file 18 [file c47c48ffcc0af7ee63d2dac0.xlsx]

## Sheet: Sheet1
Table S13 Nucleotide sequences of siRNAs used in the embryonic RNAi experiments
siRNA	Strand	Sequence(5'→3')
Egfp si	Sense	CAACAGCCACAACGUCUAUUU
	Antisense	AUAGACGUUGUGGCUGUUGUa
LdMasc-W si1	Sense	CCACAAUAAAUUUCAAAga
	Antisense	UUUGAAAAUUUAUUUGUUGGaa
LdMasc-W si2	Sense	CAAAAAAACUCAAUAUUAAUU
	Antisense	UUAAUAUUGAGUUUUUUUGag
