# Supplementary material
Source: Research Square preprint supplement (doi:10.21203/rs.3.rs-8963102/v1)
Supplement: Supplementary file 21 [file d1c70301b5d68267c8707e0c.xlsx]

## Sheet: 名称未設定2
Table S6 Result of the BLASTn search using the Fet-W piRNA sequence as a query against the whole genome sequence of Lymantria dispar asiatica
contig name	contig size(bp)	chromosome	number	e-value	Identity	Identity(%)	Query Start	Query End	size(bp)	Sbjct Start	Sbjct End
CM063456.1	32411931	W	1	1e-08	29/29	100	1	29	29	33742796	16871398
			2	1e-08	29/29	100	1	29	29	33761712	16880856
			3	1e-08	29/29	100	1	29	29	33801932	16900966
			4	1e-08	29/29	100	1	29	29	33802092	16901046
			5	1e-08	29/29	100	1	29	29	33807010	16903505
			6	1e-08	29/29	100	1	29	29	33807752	16903876
			7	1e-08	29/29	100	1	29	29	33807912	16903956
			8	1e-08	29/29	100	1	29	29	33810348	16905174
			9	1e-08	29/29	100	1	29	29	33811090	16905545
			10	1e-08	29/29	100	1	29	29	33811250	16905625
			11	1e-08	29/29	100	1	29	29	33816168	16908084
			12	1e-08	29/29	100	1	29	29	33816910	16908455
			13	1e-08	29/29	100	1	29	29	33817070	16908535
			14	1e-08	29/29	100	1	29	29	33823858	16911929
			15	1e-08	29/29	100	1	29	29	33824018	16912009
			16	1e-08	29/29	100	1	29	29	33829934	16914967
			17	1e-08	29/29	100	1	29	29	33830094	16915047
			18	1e-08	29/29	100	1	29	29	33835142	16917571
			19	1e-08	29/29	100	1	29	29	33835884	16917942
			20	1e-08	29/29	100	1	29	29	33840096	16920048
			21	1e-08	29/29	100	1	29	29	33840256	16920128
			22	1e-08	29/29	100	1	29	29	33841794	16920897
			23	1e-08	29/29	100	1	29	29	33845018	16922509
			24	1e-08	29/29	100	1	29	29	33845760	16922880
			25	1e-08	29/29	100	1	29	29	33850714	16925357
			26	1e-08	29/29	100	1	29	29	33850874	16925437
			27	1e-08	29/29	100	1	29	29	33852412	16926206
			28	1e-08	29/29	100	1	29	29	33855508	16927754
			29	1e-08	29/29	100	1	29	29	33855668	16927834
			30	1e-08	29/29	100	1	29	29	33857394	16928697
			31	1e-08	29/29	100	1	29	29	33859672	16929836
			32	1e-08	29/29	100	1	29	29	33862768	16931384
			33	1e-08	29/29	100	1	29	29	33862928	16931464
			34	1e-08	29/29	100	1	29	29	33869516	16934758
			35	1e-08	29/29	100	1	29	29	33870258	16935129
			36	1e-08	29/29	100	1	29	29	33870418	16935209
			37	1e-08	29/29	100	1	29	29	33872164	16936082
			38	1e-08	29/29	100	1	29	29	33875260	16937630
			39	1e-08	29/29	100	1	29	29	33880232	16940116
			40	1e-08	29/29	100	1	29	29	33884464	16942232
			41	1e-08	29/29	100	1	29	29	33885206	16942603
			42	1e-08	29/29	100	1	29	29	33890016	16945008
			43	1e-08	29/29	100	1	29	29	33890758	16945379
			44	1e-08	29/29	100	1	29	29	33891500	16945750
			45	1e-08	29/29	100	1	29	29	33893968	16946984
			46	1e-08	29/29	100	1	29	29	33894710	16947355
			47	1e-08	29/29	100	1	29	29	33894870	16947435
			48	1e-08	29/29	100	1	29	29	33896616	16948308
			49	1e-08	29/29	100	1	29	29	33898232	16949116
			50	1e-08	29/29	100	1	29	29	33903072	16951536
			51	1e-08	29/29	100	1	29	29	33903814	16951907
			52	1e-08	29/29	100	1	29	29	33904556	16952278
			53	1e-08	29/29	100	1	29	29	33908606	16954303
			54	1e-08	29/29	100	1	29	29	33909348	16954674
			55	1e-08	29/29	100	1	29	29	33909508	16954754
			56	1e-08	29/29	100	1	29	29	33911254	16955627
			57	1e-08	29/29	100	1	29	29	33914350	16957175
			58	1e-08	29/29	100	1	29	29	33917578	16958789
			59	1e-08	29/29	100	1	29	29	33918320	16959160
			60	1e-08	29/29	100	1	29	29	33925616	16962808
			61	1e-08	29/29	100	1	29	29	33926358	16963179
			62	1e-08	29/29	100	1	29	29	33927100	16963550
			63	1e-08	29/29	100	1	29	29	33932884	16966442
			64	1e-08	29/29	100	1	29	29	33933626	16966813
			65	1e-08	29/29	100	1	29	29	33934368	16967184
			66	1e-08	29/29	100	1	29	29	33936854	16968427
			67	1e-08	29/29	100	1	29	29	33937596	16968798
			68	1e-08	29/29	100	1	29	29	33938338	16969169
			69	1e-08	29/29	100	1	29	29	33942406	16971203
			70	1e-08	29/29	100	1	29	29	33945630	16972815
			71	1e-08	29/29	100	1	29	29	33950426	16975213
			72	1e-08	29/29	100	1	29	29	33954494	16977247
			73	1e-08	29/29	100	1	29	29	33957718	16978859
			74	1e-08	29/29	100	1	29	29	33962514	16981257
			75	1e-08	29/29	100	1	29	29	33964126	16982063
			76	1e-08	29/29	100	1	29	29	33967192	16983596
			77	1e-08	29/29	100	1	29	29	33969678	16984839
			78	1e-08	29/29	100	1	29	29	33972160	16986080
			79	1e-08	29/29	100	1	29	29	33977260	16988630
			80	1e-08	29/29	100	1	29	29	33982972	16991486
			81	1e-08	29/29	100	1	29	29	33984456	16992228
			82	1e-08	29/29	100	1	29	29	33986070	16993035
			83	1e-08	29/29	100	1	29	29	33988424	16994212
			84	1e-08	29/29	100	1	29	29	33997490	16998745
			85	1e-08	29/29	100	1	29	29	33999104	16999552
			86	1e-08	29/29	100	1	29	29	34001458	17000729
			87	1e-08	29/29	100	1	29	29	34008782	17004391
			88	1e-08	29/29	100	1	29	29	34010396	17005198
			89	1e-08	29/29	100	1	29	29	34012750	17006375
			90	1e-08	29/29	100	1	29	29	34045810	17022905
			91	1e-08	29/29	100	1	29	29	34051522	17025761
			92	1e-08	29/29	100	1	29	29	34057234	17028617
			93	1e-08	29/29	100	1	29	29	34059590	17029795
			94	1e-08	29/29	100	1	29	29	34067914	17033957
			95	1e-08	29/29	100	1	29	29	34076688	17038344
			96	1e-08	29/29	100	1	29	29	34079756	17039878
			97	1e-08	29/29	100	1	29	29	34083534	17041767
			98	1e-08	29/29	100	1	29	29	34087312	17043656
			99	1e-08	29/29	100	1	29	29	34091118	17045559
			100	1e-08	29/29	100	1	29	29	34095958	17047979
			101	1e-08	29/29	100	1	29	29	34103284	17051642
			102	1e-08	29/29	100	1	29	29	34106350	17053175
			103	1e-08	29/29	100	1	29	29	34109816	17054908
			104	1e-08	29/29	100	1	29	29	34112882	17056441
			105	1e-08	29/29	100	1	29	29	34118952	17059476
			106	1e-08	29/29	100	1	29	29	34121278	17060639
			107	1e-08	29/29	100	1	29	29	34126060	17063030
			108	1e-08	29/29	100	1	29	29	34129126	17064563
			109	1e-08	29/29	100	1	29	29	34129868	17064934
			110	1e-08	29/29	100	1	29	29	34133214	17066607
			111	1e-08	29/29	100	1	29	29	34136560	17068280
			112	1e-08	29/29	100	1	29	29	34141532	17070766
			113	1e-08	29/29	100	1	29	29	34144598	17072299
			114	1e-08	29/29	100	1	29	29	34147080	17073540
			115	1e-08	29/29	100	1	29	29	34148694	17074347
			116	1e-08	29/29	100	1	29	29	34151176	17075588
			117	1e-08	29/29	100	1	29	29	34152790	17076395
