# Supplementary material
Source: Research Square preprint supplement (doi:10.21203/rs.3.rs-8963102/v1)
Supplement: Supplementary file 22 [file d948857d34d064efe291d1a3.xlsx]

## Sheet: 名称未設定2
Table S1 Result of BLASTn search against the whole genome sequence of Lymantria dispar japonica.
contig name	contig size(bp)	chromosome	Score	e-value	Identity	Identity(%)	Query Start	Query End	size(bp)	Sbjct Start	Sbjct End
BAAIJM010000020	44872530	Z	35421	0	19301/19355	99	1	19341	19341	14495757	14515102
			35357	0	19290/19354	99	1	19341	19341	14637621	14656955
BAAIJM010000036	6280420	W	11671	0	6349/6363	99	12981	19341	6361	4852111	4845749
BAAIJM010000281	38560	W	9936	0	5408/5421	99	13924	19341	5418	28454	33874
BAAIJM010000267	43822	W	9936	0	5408/5421	99	13924	19341	5418	31810	26390
BAAIJM010000266	70131	W	9936	0	5408/5421	99	13924	19341	5418	51208	56628
BAAIJM010000250	53100	W	9936	0	5408/5421	99	13924	19341	5418	24020	18600
BAAIJM010000215	38275	W	9936	0	5408/5421	99	13924	19341	5418	23227	17807
BAAIJM010000164	144531	W	9936	0	5408/5421	99	13924	19341	5418	684	6104
			9926	0	5407/5422	99	13923	19341	5419	33906	39326
			9810	0	5389/5422	99	13922	19341	5420	143974	138572
BAAIJM010000060	177654	W	9936	0	5408/5421	99	13924	19341	5418	21782	16362
BAAIJM010000037	1696160	W	9932	0	5413/5429	99	13917	19341	5425	205672	200245
			9926	0	5407/5422	99	13923	19341	5419	1646829	1652249
			9921	0	5403/5418	99	13926	19341	5416	130788	136205
			9919	0	5399/5412	99	13932	19341	5410	180155	174745
BAAIJM010000285	51461	W	9926	0	5407/5422	99	13922	19341	5420	11879	6459
			9926	0	5407/5422	99	13922	19341	5420	20111	14691
BAAIJM010000256	46670	W	9926	0	5407/5422	99	13922	19341	5420	14556	9136
			9926	0	5407/5422	99	13922	19341	5420	22788	17368
BAAIJM010000252	120860	W	9926	0	5407/5422	99	13922	19341	5420	90023	84603
			9926	0	5407/5422	99	13922	19341	5420	114101	108681
			9921	0	5406/5422	99	13922	19341	5420	75128	69708
			9921	0	5406/5422	99	13922	19341	5420	98255	92835
BAAIJM010000241	46924	W	9926	0	5407/5422	99	13923	19341	5419	31145	36565
BAAIJM010000234	65354	W	9926	0	5407/5422	99	13922	19341	5420	9517	4097
BAAIJM010000233	78932	W	9926	0	5409/5425	99	13919	19341	5423	600	6023
			9926	0	5409/5425	99	13919	19341	5423	15495	20918
BAAIJM010000225	40660	W	9926	0	5409/5425	99	13919	19341	5423	9781	15204
BAAIJM010000224	42912	W	9926	0	5409/5425	99	13919	19341	5423	27410	32833
			9926	0	5409/5425	99	13919	19341	5423	35642	41065
BAAIJM010000197	49036	W	9926	0	5407/5422	99	13922	19341	5420	16832	11412
			9921	0	5406/5422	99	13922	19341	5420	25804	20384
BAAIJM010000185	70197	W	9926	0	5409/5425	99	13919	19341	5423	14005	19428
			9921	0	5408/5425	99	13919	19341	5423	22237	27660
			9921	0	5408/5425	99	13919	19341	5423	37132	42555
BAAIJM010000172	67142	W	9926	0	5409/5425	99	13919	19341	5423	15855	21278
			9875	0	5403/5428	99	13919	19341	5423	963	6383
BAAIJM010000132	36767	W	9926	0	5409/5425	99	13919	19341	5423	6996	12419
BAAIJM010000131	76097	W	9926	0	5398/5409	99	13935	19341	5407	38836	33428
			9884	0	5402/5424	99	13924	19341	5418	72065	66648
BAAIJM010000093	60899	W	9926	0	5407/5422	99	13922	19341	5420	51104	45684
	45498	W	9923	0	5409/5426	99	13919	19341	5423	3637	9061
	65228	W	9921	0	5406/5422	99	13922	19341	5420	59258	53839
	39666	W	9921	0	5408/5425	99	13919	19341	5423	28546	33968
BAAIJM010000296	42203	W	9917	0	5407/5424	99	13922	19341	5420	27151	21729
BAAIJM010000176	72712	W	9913	0	5396/5409	99	13935	19341	5407	67058	61652
BAAIJM010000205	41156	W	9895	0	5394/5410	99	13935	19341	5407	7724	2319
			9561	0	5358/5433	99	13935	19341	5407	40935	35539
BAAIJM010000079	59802	W	9882	0	5407/5432	99	13919	19341	5423	49002	54430
			9708	0	5379/5431	99	13919	19341	5423	34094	39496
BAAIJM010000077	36332	W	9402	0	5114/5125	99	13935	19057	5123	5125	1
	36643	W	9291	0	5052/5062	99	14282	19341	5060	36643	31582
BAAIJM010000170	54170	W	9276	0	5069/5089	99	14259	19341	5083	1	5083
