# Supplementary material
Source: Research Square preprint supplement (doi:10.21203/rs.3.rs-8963102/v1)
Supplement: Supplementary file 23 [file d9a7cf08f8e3f53c2145201d.xlsx]

## Sheet: 統合
Tabe S12 Contigs showing sex differences in coverage
Contigs showing a higher coverage in maes (=possibey derived from the Z chromosome)				Contigs showing a higher coverage in femaes (=possiby derived from the W chromosome)				Contigs with zero coverage in maes (=derived from the W chromosome)
contig	Mean coverage in femaes	Mean coverage in maes	sex ratio in coverage（♂/♀）	contig	Mean coverage in femaes	Mean coverage in maes	sex ratio in coverage（♂/♀）	contig	Mean coverage in femaes	Mean coverage in maes	sex ratio in coverage（♂/♀）
BAAIJM010000020	13	24	1.84615	BAAIJM010000009	32	7	0.21875	BAAIJM010000033	24	0	0
BAAIJM010000049	9	16	1.77778	BAAIJM010000031	17	1	0.0588235	BAAIJM010000036	29	0	0
BAAIJM010000086	8	14	1.75	BAAIJM010000041	35	1	0.0285714	BAAIJM010000037	27	0	0
BAAIJM0100000113	7	13	1.85714	BAAIJM010000047	36	5	0.138889	BAAIJM010000048	37	0	0
BAAIJM0100000160	10	18	1.8	BAAIJM010000051	44	26	0.590909	BAAIJM010000054	30	0	0
BAAIJM0100000188	10	20	2	BAAIJM010000057	35	5	0.142857	BAAIJM010000061	29	0	0
BAAIJM0100000207	0	13	∞	BAAIJM010000058	34	5	0.147059	BAAIJM010000063	34	0	0
				BAAIJM010000059	37	1	0.027027	BAAIJM010000065	25	0	0
				BAAIJM010000060	45	1	0.0222222	BAAIJM010000072	26	0	0
				BAAIJM010000068	25	10	0.4	BAAIJM010000075	46	0	0
				BAAIJM010000077	41	1	0.0243902	BAAIJM010000078	33	0	0
				BAAIJM010000080	35	6	0.171429	BAAIJM010000079	33	0	0
				BAAIJM010000083	18	8	0.444444	BAAIJM010000082	39	0	0
				BAAIJM010000085	39	3	0.0769231	BAAIJM010000087	36	0	0
				BAAIJM010000091	34	4	0.117647	BAAIJM010000092	37	0	0
				BAAIJM0100000108	35	4	0.114286	BAAIJM010000093	40	0	0
				BAAIJM0100000111	29	1	0.0344828	BAAIJM010000094	32	0	0
				BAAIJM0100000112	36	1	0.0277778	BAAIJM010000095	45	0	0
				BAAIJM0100000114	40	22	0.55	BAAIJM010000097	31	0	0
				BAAIJM0100000115	42	25	0.595238	BAAIJM010000099	29	0	0
				BAAIJM0100000116	35	1	0.0285714	BAAIJM0100000100	36	0	0
				BAAIJM0100000119	35	5	0.142857	BAAIJM0100000103	29	0	0
				BAAIJM0100000122	37	1	0.027027	BAAIJM0100000104	34	0	0
				BAAIJM0100000124	32	2	0.0625	BAAIJM0100000110	34	0	0
				BAAIJM0100000126	33	4	0.121212	BAAIJM0100000129	34	0	0
				BAAIJM0100000128	34	5	0.147059	BAAIJM0100000131	43	0	0
				BAAIJM0100000130	45	25	0.555556	BAAIJM0100000132	39	0	0
				BAAIJM0100000141	33	5	0.151515	BAAIJM0100000134	28	0	0
				BAAIJM0100000142	43	24	0.55814	BAAIJM0100000135	28	0	0
				BAAIJM0100000149	33	5	0.151515	BAAIJM0100000136	36	0	0
				BAAIJM0100000150	33	5	0.151515	BAAIJM0100000140	35	0	0
				BAAIJM0100000153	31	3	0.0967742	BAAIJM0100000143	34	0	0
				BAAIJM0100000157	44	24	0.545455	BAAIJM0100000144	18	0	0
				BAAIJM0100000158	33	4	0.121212	BAAIJM0100000145	34	0	0
				BAAIJM0100000161	33	4	0.121212	BAAIJM0100000147	28	0	0
				BAAIJM0100000162	33	5	0.151515	BAAIJM0100000151	35	0	0
				BAAIJM0100000163	34	5	0.147059	BAAIJM0100000152	29	0	0
				BAAIJM0100000173	39	2	0.0512821	BAAIJM0100000154	25	0	0
				BAAIJM0100000174	31	4	0.129032	BAAIJM0100000156	33	0	0
				BAAIJM0100000175	31	5	0.16129	BAAIJM0100000164	42	0	0
				BAAIJM0100000178	39	3	0.0769231	BAAIJM0100000166	38	0	0
				BAAIJM0100000180	37	1	0.027027	BAAIJM0100000170	42	0	0
				BAAIJM0100000186	20	1	0.05	BAAIJM0100000172	40	0	0
				BAAIJM0100000187	31	4	0.129032	BAAIJM0100000176	43	0	0
				BAAIJM0100000190	34	1	0.0294118	BAAIJM0100000177	32	0	0
				BAAIJM0100000192	34	1	0.0294118	BAAIJM0100000179	35	0	0
				BAAIJM0100000200	32	4	0.125	BAAIJM0100000181	35	0	0
				BAAIJM0100000201	32	4	0.125	BAAIJM0100000183	31	0	0
				BAAIJM0100000204	32	5	0.15625	BAAIJM0100000185	36	0	0
				BAAIJM0100000205	40	1	0.025	BAAIJM0100000189	13	0	0
				BAAIJM0100000208	34	4	0.117647	BAAIJM0100000191	21	0	0
				BAAIJM0100000212	32	4	0.125	BAAIJM0100000193	37	0	0
				BAAIJM0100000215	38	1	0.0263158	BAAIJM0100000194	28	0	0
				BAAIJM0100000221	32	4	0.125	BAAIJM0100000195	32	0	0
				BAAIJM0100000222	37	2	0.0540541	BAAIJM0100000197	34	0	0
				BAAIJM0100000223	30	2	0.0666667	BAAIJM0100000198	32	0	0
				BAAIJM0100000227	32	5	0.15625	BAAIJM0100000199I	38	0	0
				BAAIJM0100000228	35	4	0.114286	BAAIJM0100000202	44	0	0
				BAAIJM0100000231	34	4	0.117647	BAAIJM0100000209	46	0	0
				BAAIJM0100000232	35	4	0.114286	BAAIJM0100000210	33	0	0
				BAAIJM0100000235	37	4	0.108108	BAAIJM0100000211	30	0	0
				BAAIJM0100000238	35	5	0.142857	BAAIJM0100000213	21	0	0
				BAAIJM0100000240	35	4	0.114286	BAAIJM0100000214	38	0	0
				BAAIJM0100000241	42	1	0.0238095	BAAIJM0100000216	30	0	0
				BAAIJM0100000242	25	1	0.04	BAAIJM0100000218	36	0	0
				BAAIJM0100000243	51	26	0.509804	BAAIJM0100000219	28	0	0
				BAAIJM0100000247	30	3	0.1	BAAIJM0100000220	30	0	0
				BAAIJM0100000250	41	1	0.0243902	BAAIJM0100000224	34	0	0
				BAAIJM0100000254	36	5	0.138889	BAAIJM0100000225	36	0	0
				BAAIJM0100000255	42	1	0.0238095	BAAIJM0100000226	51	0	0
				BAAIJM0100000258	36	3	0.0833333	BAAIJM0100000229	23	0	0
				BAAIJM0100000264	50	30	0.6	BAAIJM0100000230	34	0	0
				BAAIJM0100000266	42	2	0.047619	BAAIJM0100000233	42	0	0
				BAAIJM0100000267	39	1	0.025641	BAAIJM0100000234	33	0	0
				BAAIJM0100000270	46	1	0.0217391	BAAIJM0100000236	34	0	0
				BAAIJM0100000277	37	4	0.108108	BAAIJM0100000244	33	0	0
				BAAIJM0100000278	38	1	0.0263158	BAAIJM0100000245	37	0	0
				BAAIJM0100000281	39	1	0.025641	BAAIJM0100000246	35	0	0
				BAAIJM0100000287	37	4	0.108108	BAAIJM0100000248	32	0	0
				BAAIJM0100000288	39	4	0.102564	BAAIJM0100000249	39	0	0
				BAAIJM0100000290	23	13	0.565217	BAAIJM0100000251	27	0	0
				BAAIJM0100000301	39	5	0.128205	BAAIJM0100000252	39	0	0
				BAAIJM0100000302	38	4	0.105263	BAAIJM0100000253	39	0	0
				BAAIJM0100000307	34	3	0.0882353	BAAIJM0100000256	33	0	0
				BAAIJM0100000308	22	2	0.0909091	BAAIJM0100000259	15	0	0
				BAAIJM0100000310	38	3	0.0789474	BAAIJM0100000260	37	0	0
				BAAIJM0100000311	18	11	0.611111	BAAIJM0100000261	32	0	0
				BAAIJM0100000313	43	4	0.0930233	BAAIJM0100000262	27	0	0
				BAAIJM0100000314	38	8	0.210526	BAAIJM0100000263	36	0	0
				BAAIJM0100000315	27	16	0.592593	BAAIJM0100000265	38	0	0
								BAAIJM0100000269	31	0	0
								BAAIJM0100000271	43	0	0
								BAAIJM0100000273	34	0	0
								BAAIJM0100000276	32	0	0
								BAAIJM0100000279	29	0	0
								BAAIJM0100000280	35	0	0
								BAAIJM0100000283	37	0	0
								BAAIJM0100000284	29	0	0
								BAAIJM0100000285	33	0	0
								BAAIJM0100000289	27	0	0
								BAAIJM0100000293	30	0	0
								BAAIJM0100000294	34	0	0
								BAAIJM0100000296	21	0	0
								BAAIJM0100000298	26	0	0
								BAAIJM0100000299	31	0	0
								BAAIJM0100000300	28	0	0
								BAAIJM0100000304	32	0	0
								BAAIJM0100000312	29	0	0

## Sheet: 雄において高い
表1. オスにおいて高いcoverageを示したcontig (=Z染色体由来の可能性あり）
contig名	メスにおける平均coverage	オスにおける平均coverage	coverageの 性比（♂/♀）
ptg000020I	13	24	1.84615
ptg000049l	9	16	1.77778
ptg000086l	8	14	1.75
ptg000113l	7	13	1.85714
ptg000160l	10	18	1.8
ptg000188l	10	20	2
ptg000207l	0	13	∞

## Sheet: 雌において高い
表2. メスにおいて高いcoverageを示したcontig (=W染色体由来の可能性あり）
contig名	メスにおける 平均coverage	オスにおける 平均coverage	coverageの 性比（♂/♀）
ptg000009l	32	7	0.21875
ptg000031	17	1	0.0588235
ptg000041l	35	1	0.0285714
ptg000047l	36	5	0.138889
ptg000051l	44	26	0.590909
ptg000057l	35	5	0.142857
ptg000058l	34	5	0.147059
ptg000059l	37	1	0.027027
ptg000060l	45	1	0.0222222
ptg000068l	25	10	0.4
ptg000077l	41	1	0.0243902
ptg000080l	35	6	0.171429
ptg000083l	18	8	0.444444
ptg000085l	39	3	0.0769231
ptg000091l	34	4	0.117647
ptg000108l	35	4	0.114286
ptg000111l	29	1	0.0344828
ptg000112l	36	1	0.0277778
ptg000114l	40	22	0.55
ptg000115l	42	25	0.595238
ptg000116l	35	1	0.0285714
ptg000119l	35	5	0.142857
ptg000122l	37	1	0.027027
ptg000124l	32	2	0.0625
ptg000126l	33	4	0.121212
ptg000128l	34	5	0.147059
ptg000130l	45	25	0.555556
ptg000141l	33	5	0.151515
ptg000142l	43	24	0.55814
ptg000149l	33	5	0.151515
ptg000150l	33	5	0.151515
ptg000153l	31	3	0.0967742
ptg000157l	44	24	0.545455
ptg000158l	33	4	0.121212
ptg000161l	33	4	0.121212
ptg000162l	33	5	0.151515
ptg000163l	34	5	0.147059
ptg000173l	39	2	0.0512821
ptg000174l	31	4	0.129032
ptg000175l	31	5	0.16129
ptg000178l	39	3	0.0769231
ptg000180l	37	1	0.027027
ptg000186l	20	1	0.05
ptg000187l	31	4	0.129032
ptg000190l	34	1	0.0294118
ptg000192l	34	1	0.0294118
ptg000200l	32	4	0.125
ptg000201l	32	4	0.125
ptg000204l	32	5	0.15625
ptg000205l	40	1	0.025
ptg000208l	34	4	0.117647
ptg000212l	32	4	0.125
ptg000215l	38	1	0.0263158
ptg000221l	32	4	0.125
ptg000222l	37	2	0.0540541
ptg000223l	30	2	0.0666667
ptg000227l	32	5	0.15625
ptg000228l	35	4	0.114286
ptg000231l	34	4	0.117647
ptg000232l	35	4	0.114286
ptg000235l	37	4	0.108108
ptg000238l	35	5	0.142857
ptg000240l	35	4	0.114286
ptg000241l	42	1	0.0238095
ptg000242l	25	1	0.04
ptg000243l	51	26	0.509804
ptg000247l	30	3	0.1
ptg000250l	41	1	0.0243902
ptg000254l	36	5	0.138889
ptg000255l	42	1	0.0238095
ptg000258l	36	3	0.0833333
ptg000264l	50	30	0.6
ptg000266l	42	2	0.047619
ptg000267l	39	1	0.025641
ptg000270l	46	1	0.0217391
ptg000277l	37	4	0.108108
ptg000278l	38	1	0.0263158
ptg000281l	39	1	0.025641
ptg000287l	37	4	0.108108
ptg000288l	39	4	0.102564
ptg000290l	23	13	0.565217
ptg000301l	39	5	0.128205
ptg000302l	38	4	0.105263
ptg000307l	34	3	0.0882353
ptg000308l	22	2	0.0909091
ptg000310l	38	3	0.0789474
ptg000311l	18	11	0.611111
ptg000313l	43	4	0.0930233
ptg000314l	38	8	0.210526
ptg000315l	27	16	0.592593

## Sheet: 雄0
表3. オスにおけるcoverageが0のcontig(=W染色体由来）
contig名	メスにおける平均coverage	オスにおける平均coverage	coverageの 性比（♂/♀）
ptg000033l	24	0	0
ptg000036l	29	0	0
ptg000037l	27	0	0
ptg000048l	37	0	0
ptg000054l	30	0	0
ptg000061l	29	0	0
ptg000063l	34	0	0
ptg000065l	25	0	0
ptg000072l	26	0	0
ptg000075l	46	0	0
ptg000078l	33	0	0
ptg000079l	33	0	0
ptg000082l	39	0	0
ptg000087l	36	0	0
ptg000092l	37	0	0
ptg000093l	40	0	0
ptg000094l	32	0	0
ptg000095l	45	0	0
ptg000097l	31	0	0
ptg000099l	29	0	0
ptg000100l	36	0	0
ptg000103l	29	0	0
ptg000104l	34	0	0
ptg000110l	34	0	0
ptg000129l	34	0	0
ptg000131l	43	0	0
ptg000132l	39	0	0
ptg000134l	28	0	0
ptg000135l	28	0	0
ptg000136l	36	0	0
ptg000140l	35	0	0
ptg000143l	34	0	0
ptg000144l	18	0	0
ptg000145l	34	0	0
ptg000147l	28	0	0
ptg000151l	35	0	0
ptg000152l	29	0	0
ptg000154l	25	0	0
ptg000156l	33	0	0
ptg000164l	42	0	0
ptg000166l	38	0	0
ptg000170l	42	0	0
ptg000172l	40	0	0
ptg000176l	43	0	0
ptg000177l	32	0	0
ptg000179l	35	0	0
ptg000181l	35	0	0
ptg000183l	31	0	0
ptg000185l	36	0	0
ptg000189l	13	0	0
ptg000191l	21	0	0
ptg000193l	37	0	0
ptg000194l	28	0	0
ptg000195l	32	0	0
ptg000197l	34	0	0
ptg000198l	32	0	0
ptg000199I	38	0	0
ptg000202l	44	0	0
ptg000209l	46	0	0
ptg000210l	33	0	0
ptg000211l	30	0	0
ptg000213l	21	0	0
ptg000214l	38	0	0
ptg000216l	30	0	0
ptg000218l	36	0	0
ptg000219l	28	0	0
ptg000220l	30	0	0
ptg000224l	34	0	0
ptg000225l	36	0	0
ptg000226l	51	0	0
ptg000229l	23	0	0
ptg000230l	34	0	0
ptg000233l	42	0	0
ptg000234l	33	0	0
ptg000236l	34	0	0
ptg000244l	33	0	0
ptg000245l	37	0	0
ptg000246l	35	0	0
ptg000248l	32	0	0
ptg000249l	39	0	0
ptg000251l	27	0	0
ptg000252l	39	0	0
ptg000253l	39	0	0
ptg000256l	33	0	0
ptg000259l	15	0	0
ptg000260l	37	0	0
ptg000261l	32	0	0
ptg000262l	27	0	0
ptg000263l	36	0	0
ptg000265l	38	0	0
ptg000269l	31	0	0
ptg000271l	43	0	0
ptg000273l	34	0	0
ptg000276l	32	0	0
ptg000279l	29	0	0
ptg000280l	35	0	0
ptg000283l	37	0	0
ptg000284l	29	0	0
ptg000285l	33	0	0
ptg000289l	27	0	0
ptg000293l	30	0	0
ptg000294l	34	0	0
ptg000296l	21	0	0
ptg000298l	26	0	0
ptg000299l	31	0	0
ptg000300l	28	0	0
ptg000304l	32	0	0
ptg000312l	29	0	0
