# Supplementary material
Source: Research Square preprint supplement (doi:10.21203/rs.3.rs-8963102/v1)
Supplement: Supplementary file 24 [file daea0e31c571bbc4ec7b2910.xlsx]

## Sheet: Sheet1
Table S8 Primer sequences used for RT-PCR
Target	Primers	Sequence(5'→3')
LdMasc	LdMascF1	CATCGTCCGGTGACCAACA
	LdMascR1	TCCTCCTCATCAGTTGTGTGTA
Lddsx	LddsxF1	GCGGATAGGCAGCGGGTAATG
	LddsxR1	CGCAAGATCACATCGCTACAAG
LdEf1-α	Ef1αF	TTTGCCTTCCTTGCGCTCAACA
	Ef1αR	TGTAAAGCAGCTGATCGTGGT
RACE4	4L	CTCTCAGCCGTACTGCTAAGCTAC
	Masc5RACE2R2	GCTGCAGGTGTTGAGCTCTGAGTAG
RACE13	13L	ATCACTACTTGACAGATCGCG
	Masc5RACE2R	GCTGCAGGTGTTGAGCTCTGAGTAG
RACE24	24L	ACAATTAGGTAATATGTCGTTGTGT
	Masc5RACE2R	GCTGCAGGTGTTGAGCTCTGAGTAG
RACE35	35L	TCAACTGAGGTTAAAGAGTCTCCAG
	Masc5RACE2R	GCTGCAGGTGTTGAGCTCTGAGTAG
RACE45	45L	AATTCCTCAGGTGTGGCATAAATTC
	Masc5RACE2R	GCTGCAGGTGTTGAGCTCTGAGTAG
RACE50	50L	CAGAATATTGCACAGGCGCAAAG
	Masc5RACE2R	GCTGCAGGTGTTGAGCTCTGAGTAG
RACE67	67L	GACTGGAGCACGAGGACACTGAATG
	Masc5RACE2R	GCTGCAGGTGTTGAGCTCTGAGTAG
RACE69	69L	GACACTGACATGGACTAAGGAGTAG
	Masc5RACE2R	GCTGCAGGTGTTGAGCTCTGAGTAG
RACE85	85L	CTGTAAGACCACTTTGATTGA
	Masc5RACE2R	GCTGCAGGTGTTGAGCTCTGAGTAG
unigenes	unigeneF	CAGCCTGTATACCATGGGCA
	Masc5RACE2R	GCTGCAGGTGTTGAGCTCTGAGTAG
