# Supplementary material
Source: Research Square preprint supplement (doi:10.21203/rs.3.rs-8963102/v1)
Supplement: Supplementary file 27 [file f01e9c498cf836e3697e6762.xlsx]

## Sheet: 名称未設定2
Table S7 Result of the blastn search using the Fet-W piRNA sequence as a query against the entire genome sequence of Lymantria umbrosa
contig name	contig size(bp)	chromosome	number	e-value	Identity	Identity(%)	Query Start	Query End	size(bp)	Sbjct Start	Sbjct End
BAAIJM010000033	5992371	unknown	1	2e-07	29/29	100	1	29	29	1890342	1890370
			2	2e-07	29/29	100	1	29	29	1898225	1898253
			3	2e-07	29/29	100	1	29	29	1912530	1912558
			4	2e-07	29/29	100	1	29	29	1937996	1938024
			5	2e-07	29/29	100	1	29	29	1939601	1939629
			6	2e-07	29/29	100	1	29	29	1940052	1940080
			7	2e-07	29/29	100	1	29	29	1940503	1940531
			8	2e-07	29/29	100	1	29	29	1941286	1941314
			9	2e-07	29/29	100	1	29	29	1943287	1943315
			10	2e-07	29/29	100	1	29	29	1948449	1948477
			11	2e-07	29/29	100	1	29	29	1950860	1950888
			12	2e-07	29/29	100	1	29	29	1951603	1951631
			13	2e-07	29/29	100	1	29	29	1952941	1952969
			14	2e-07	29/29	100	1	29	29	1954095	1954123
			15	2e-07	29/29	100	1	29	29	1954175	1954203
			16	2e-07	29/29	100	1	29	29	1955727	1955755
			17	2e-07	29/29	100	1	29	29	1956469	1956497
			18	2e-07	29/29	100	1	29	29	1957582	1957610
			19	2e-07	29/29	100	1	29	29	1958324	1958352
			20	2e-07	29/29	100	1	29	29	1959066	1959094
			21	2e-07	29/29	100	1	29	29	1960220	1960248
			22	2e-07	29/29	100	1	29	29	1960300	1960328
			23	2e-07	29/29	100	1	29	29	1961454	1961482
			24	2e-07	29/29	100	1	29	29	1961534	1961562
			25	2e-07	29/29	100	1	29	29	1962712	1962740
			26	2e-07	29/29	100	1	29	29	1963866	1963894
			27	2e-07	29/29	100	1	29	29	1963946	1963974
			28	2e-07	29/29	100	1	29	29	1965498	1965526
			29	2e-07	29/29	100	1	29	29	1966240	1966268
			30	2e-07	29/29	100	1	29	29	1967353	1967381
			31	2e-07	29/29	100	1	29	29	1968095	1968123
			32	2e-07	29/29	100	1	29	29	1968837	1968865
			33	2e-07	29/29	100	1	29	29	1969991	1970019
			34	2e-07	29/29	100	1	29	29	1970071	1970099
			35	2e-07	29/29	100	1	29	29	1971622	1971650
			36	2e-07	29/29	100	1	29	29	1972364	1972392
			37	2e-07	29/29	100	1	29	29	1973106	1973134
			38	2e-07	29/29	100	1	29	29	1973848	1973876
			39	2e-07	29/29	100	1	29	29	4775964	4775992
			40	2e-07	29/29	100	1	29	29	4776747	4776775
			41	2e-07	29/29	100	1	29	29	4776827	4776855
			42	2e-07	29/29	100	1	29	29	4777198	4777226
			43	2e-07	29/29	100	1	29	29	4792763	4792791
			44	2e-07	29/29	100	1	29	29	4796623	4796651
			45	2e-07	29/29	100	1	29	29	5606688	5606660
			46	2e-07	29/29	100	1	29	29	5610112	5610084
			47	2e-07	29/29	100	1	29	29	5635265	5635237
			48	2e-07	29/29	100	1	29	29	5635636	5635608
			49	2e-07	29/29	100	1	29	29	5637742	5637714
			50	2e-07	29/29	100	1	29	29	5639355	5639327
			51	2e-07	29/29	100	1	29	29	5639435	5639407
			52	2e-07	29/29	100	1	29	29	5641959	5641931
			53	2e-07	29/29	100	1	29	29	5642330	5642302
			54	2e-07	29/29	100	1	29	29	5643550	5643522
			55	2e-07	29/29	100	1	29	29	5643921	5643893
			56	2e-07	29/29	100	1	29	29	5646027	5645999
			57	2e-07	29/29	100	1	29	29	5647640	5647612
			58	2e-07	29/29	100	1	29	29	5647720	5647692
			59	2e-07	29/29	100	1	29	29	5650244	5650216
			60	2e-07	29/29	100	1	29	29	5650615	5650587
			61	2e-07	29/29	100	1	29	29	5651901	5651873
			62	2e-07	29/29	100	1	29	29	5651981	5651953
			63	2e-07	29/29	100	1	29	29	5655006	5654978
			64	2e-07	29/29	100	1	29	29	5655086	5655058
			65	2e-07	29/29	100	1	29	29	5657610	5657582
			66	2e-07	29/29	100	1	29	29	5657981	5657953
			67	2e-07	29/29	100	1	29	29	5661380	5661352
			68	2e-07	29/29	100	1	29	29	5661751	5661723
			69	2e-07	29/29	100	1	29	29	5661831	5661803
			70	2e-07	29/29	100	1	29	29	5662613	5662585
			71	2e-07	29/29	100	1	29	29	5663725	5663697
			72	2e-07	29/29	100	1	29	29	5664531	5664503
			73	2e-07	29/29	100	1	29	29	5664902	5664874
			74	2e-07	29/29	100	1	29	29	5664982	5664954
			75	2e-07	29/29	100	1	29	29	5665765	5665737
			76	2e-07	29/29	100	1	29	29	5668173	5668145
			77	2e-07	29/29	100	1	29	29	5669845	5669817
			78	2e-07	29/29	100	1	29	29	5671082	5671054
			79	2e-07	29/29	100	1	29	29	5671889	5671861
			80	2e-07	29/29	100	1	29	29	5673874	5673846
			81	2e-07	29/29	100	1	29	29	5687871	5687843
			82	2e-07	29/29	100	1	29	29	5695750	5695722
BAAIJM010000013	1663971	unknown	83	2e-07	29/29	100	1	29	29	359580	359552
			84	2e-07	29/29	100	1	29	29	360322	360294
			85	2e-07	29/29	100	1	29	29	361064	361036
			86	2e-07	29/29	100	1	29	29	361806	361778
			87	2e-07	29/29	100	1	29	29	362548	362520
			88	2e-07	29/29	100	1	29	29	363729	363701
			89	2e-07	29/29	100	1	29	29	363809	363781
			90	2e-07	29/29	100	1	29	29	364963	364935
			91	2e-07	29/29	100	1	29	29	365705	365677
			92	2e-07	29/29	100	1	29	29	366447	366419
			93	2e-07	29/29	100	1	29	29	367628	367600
			94	2e-07	29/29	100	1	29	29	367708	367680
			95	2e-07	29/29	100	1	29	29	370570	370542
			96	2e-07	29/29	100	1	29	29	373020	372992
			97	2e-07	29/29	100	1	29	29	373762	373734
			98	2e-07	29/29	100	1	29	29	376173	376145
			99	2e-07	29/29	100	1	29	29	378607	378579
			100	2e-07	29/29	100	1	29	29	380608	380580
			101	2e-07	29/29	100	1	29	29	381391	381363
			102	2e-07	29/29	100	1	29	29	381842	381814
			103	2e-07	29/29	100	1	29	29	382293	382265
			104	2e-07	29/29	100	1	29	29	383899	383871
			105	2e-07	29/29	100	1	29	29	401181	401153
			106	2e-07	29/29	100	1	29	29	409059	409031
			107	2e-07	29/29	100	1	29	29	1584044	1584016
			108	2e-07	29/29	100	1	29	29	1584786	1584758
			109	2e-07	29/29	100	1	29	29	1585528	1585500
			110	2e-07	29/29	100	1	29	29	1586270	1586242
			111	2e-07	29/29	100	1	29	29	1587451	1587423
			112	2e-07	29/29	100	1	29	29	1587531	1587503
			113	2e-07	29/29	100	1	29	29	1588685	1588657
			114	2e-07	29/29	100	1	29	29	1589427	1589399
			115	2e-07	29/29	100	1	29	29	1590169	1590141
			116	2e-07	29/29	100	1	29	29	1592897	1592869
			117	2e-07	29/29	100	1	29	29	1595625	1595597
			118	2e-07	29/29	100	1	29	29	1597626	1597598
			119	2e-07	29/29	100	1	29	29	1598409	1598381
			120	2e-07	29/29	100	1	29	29	1598860	1598832
			121	2e-07	29/29	100	1	29	29	1599311	1599283
			122	2e-07	29/29	100	1	29	29	1600917	1600889
			123	2e-07	29/29	100	1	29	29	1617841	1617813
			124	2e-07	29/29	100	1	29	29	1625718	1625690
