# Supplementary material
Source: Research Square preprint supplement (doi:10.21203/rs.3.rs-8963102/v1)
Supplement: Supplementary file 28 [file fd7525b0e4481e4a8341566a.xlsx]

## Sheet: 名称未設定2
Table S4 Result of the BLASTn search using the Fet-W piRNA sequence as a query against the whole genome sequence of Lymantria dispar japonica
contig name	contig size(bp)	chromosome	number	e-value	Identity	Identity(%)	Query Start	Query End	size(bp)	Sbjct Start	Sbjct End
BAAIJM010000031	2351494	W	1	1e-07	29/29	100	1	29	29	1988609	1988637
			2	1e-07	29/29	100	1	29	29	1992272	1992300
			3	1e-07	29/29	100	1	29	29	1995418	1995446
			4	1e-07	29/29	100	1	29	29	1997307	1997335
			5	1e-07	29/29	100	1	29	29	1998841	1998869
			6	1e-07	29/29	100	1	29	29	2004763	2004791
			7	1e-07	29/29	100	1	29	29	2006652	2006680
			8	1e-07	29/29	100	1	29	29	2008541	2008569
			9	1e-07	29/29	100	1	29	29	2010075	2010103
			10	1e-07	29/29	100	1	29	29	2014462	2014490
			11	1e-07	29/29	100	1	29	29	2018624	2018652
			12	1e-07	29/29	100	1	29	29	2019802	2019830
			13	1e-07	29/29	100	1	29	29	2022658	2022686
			14	1e-07	29/29	100	1	29	29	2031792	2031820
			15	1e-07	29/29	100	1	29	29	2032969	2032997
			16	1e-07	29/29	100	1	29	29	2034146	2034174
			17	1e-07	29/29	100	1	29	29	2034953	2034981
			18	1e-07	29/29	100	1	29	29	2035695	2035723
			19	1e-07	29/29	100	1	29	29	2038115	2038143
			20	1e-07	29/29	100	1	29	29	2040665	2040693
			21	1e-07	29/29	100	1	29	29	2041906	2041934
			22	1e-07	29/29	100	1	29	29	2043149	2043177
			23	1e-07	29/29	100	1	29	29	2044682	2044710
			24	1e-07	29/29	100	1	29	29	2045488	2045516
			25	1e-07	29/29	100	1	29	29	2047886	2047914
			26	1e-07	29/29	100	1	29	29	2049498	2049526
			27	1e-07	29/29	100	1	29	29	2051532	2051560
			28	1e-07	29/29	100	1	29	29	2051903	2051931
			29	1e-07	29/29	100	1	29	29	2052274	2052302
			30	1e-07	29/29	100	1	29	29	2053517	2053545
			31	1e-07	29/29	100	1	29	29	2053881	2053909
			32	1e-07	29/29	100	1	29	29	2054252	2054280
			33	1e-07	29/29	100	1	29	29	2057144	2057172
			34	1e-07	29/29	100	1	29	29	2057515	2057543
			35	1e-07	29/29	100	1	29	29	2057886	2057914
			36	1e-07	29/29	100	1	29	29	2061534	2061562
			37	1e-07	29/29	100	1	29	29	2061905	2061933
			38	1e-07	29/29	100	1	29	29	2063519	2063547
			39	1e-07	29/29	100	1	29	29	2065067	2065095
			40	1e-07	29/29	100	1	29	29	2065940	2065968
			41	1e-07	29/29	100	1	29	29	2066020	2066048
			42	1e-07	29/29	100	1	29	29	2066391	2066419
			43	1e-07	29/29	100	1	29	29	2068416	2068444
			44	1e-07	29/29	100	1	29	29	2068787	2068815
			45	1e-07	29/29	100	1	29	29	2069158	2069186
			46	1e-07	29/29	100	1	29	29	2071578	2071606
			47	1e-07	29/29	100	1	29	29	2072386	2072414
			48	1e-07	29/29	100	1	29	29	2073259	2073287
			49	1e-07	29/29	100	1	29	29	2073339	2073367
			50	1e-07	29/29	100	1	29	29	2073710	2073738
			51	1e-07	29/29	100	1	29	29	2074944	2074972
			52	1e-07	29/29	100	1	29	29	2075315	2075343
			53	1e-07	29/29	100	1	29	29	2075686	2075714
			54	1e-07	29/29	100	1	29	29	2078091	2078119
			55	1e-07	29/29	100	1	29	29	2078462	2078490
			56	1e-07	29/29	100	1	29	29	2080578	2080606
			57	1e-07	29/29	100	1	29	29	2083064	2083092
			58	1e-07	29/29	100	1	29	29	2084612	2084640
			59	1e-07	29/29	100	1	29	29	2085485	2085513
			60	1e-07	29/29	100	1	29	29	2085565	2085593
			61	1e-07	29/29	100	1	29	29	2085936	2085964
			62	1e-07	29/29	100	1	29	29	2089230	2089258
			63	1e-07	29/29	100	1	29	29	2089310	2089338
			64	1e-07	29/29	100	1	29	29	2090858	2090886
			65	1e-07	29/29	100	1	29	29	2091627	2091655
			66	1e-07	29/29	100	1	29	29	2091707	2091735
			67	1e-07	29/29	100	1	29	29	2094184	2094212
			68	1e-07	29/29	100	1	29	29	2094555	2094583
			69	1e-07	29/29	100	1	29	29	2096167	2096195
			70	1e-07	29/29	100	1	29	29	2097765	2097793
			71	1e-07	29/29	100	1	29	29	2098534	2098562
			72	1e-07	29/29	100	1	29	29	2098614	2098642
			73	1e-07	29/29	100	1	29	29	2100720	2100748
			74	1e-07	29/29	100	1	29	29	2101091	2101119
			75	1e-07	29/29	100	1	29	29	2103615	2103643
			76	1e-07	29/29	100	1	29	29	2103695	2103723
			77	1e-07	29/29	100	1	29	29	2106653	2106681
			78	1e-07	29/29	100	1	29	29	2106733	2106761
			79	1e-07	29/29	100	1	29	29	2110127	2110155
			80	1e-07	29/29	100	1	29	29	2110207	2110235
			81	1e-07	29/29	100	1	29	29	2110578	2110606
			82	1e-07	29/29	100	1	29	29	2113037	2113065
			83	1e-07	29/29	100	1	29	29	2113117	2113145
			84	1e-07	29/29	100	1	29	29	2113488	2113516
			85	1e-07	29/29	100	1	29	29	2114706	2114734
			86	1e-07	29/29	100	1	29	29	2114786	2114814
			87	1e-07	29/29	100	1	29	29	2115157	2115185
			88	1e-07	29/29	100	1	29	29	2117616	2117644
			89	1e-07	29/29	100	1	29	29	2117696	2117724
			90	1e-07	29/29	100	1	29	29	2137785	2137813
			91	1e-07	29/29	100	1	29	29	2147243	2147271
